# Supplementary material for: Concurrent inhibition of oncogenic and wild-type RAS-GTP for cancer therapy
Source: Research Square preprint supplement (doi:10.21203/rs.3.rs-3122478/v1), 2023-07-07
Supplement: Supplementary file 1 [file 17d8222f6f08620b9a36f167.xlsx]

## Sheet: prism_data_auc_7977(33)
Cell line (ccle_name)	Area under the curve (AUC)
143B_BONE	0.552105
1618K_TESTIS	0.720373
1777NRPMET_TESTIS	0.877276
22RV1_PROSTATE	0.927343
2313287_STOMACH	0.6455
253J_URINARY_TRACT	0.787046
253JBV_URINARY_TRACT	0.754671
42MGBA_CENTRAL_NERVOUS_SYSTEM	0.821458
5637_URINARY_TRACT	0.519821
639V_URINARY_TRACT	0.578621
647V_URINARY_TRACT	0.792964
697_HAEMATOPOIETIC_AND_LYMPHOID_TISSUE	0.740152
769P_KIDNEY	0.902527
786O_KIDNEY	0.959258
8305C_THYROID	0.842494
8505C_THYROID	0.997843
8MGBA_CENTRAL_NERVOUS_SYSTEM	0.904229
921_UVEA	0.758136
93T449_SOFT_TISSUE	0.890645
94T778_SOFT_TISSUE	0.657239
9505BIK_PANCREAS	0.252502
95T1000_SOFT_TISSUE	0.567523
A101D_SKIN	0.933106
A1207_CENTRAL_NERVOUS_SYSTEM	0.995366
A172_CENTRAL_NERVOUS_SYSTEM	0.863033
A204_SOFT_TISSUE	0.70449
A2058_SKIN	0.725909
A253_SALIVARY_GLAND	0.469596
A2780_OVARY	0.7059
A375_SKIN	0.856111
A388_SKIN	0.436845
A3KAW_HAEMATOPOIETIC_AND_LYMPHOID_TISSUE	0.484621
A427_LUNG	0.466537
A498_KIDNEY	0.669889
A549_LUNG	0.601523
A673_BONE	0.92386
A704_KIDNEY	1
ABC1_LUNG	0.802647
ACCMESO1_PLEURA	0.668385
ACHN_KIDNEY	0.590258
AGS_STOMACH	0.456605
ALLSIL_HAEMATOPOIETIC_AND_LYMPHOID_TISSUE	0.841903
AM38_CENTRAL_NERVOUS_SYSTEM	0.864728
AMO1_HAEMATOPOIETIC_AND_LYMPHOID_TISSUE	0.813038
AN3CA_ENDOMETRIUM	0.590732
ANGMCSS_CENTRAL_NERVOUS_SYSTEM	0.890509
ASPC1_PANCREAS	0.486096
AU565_BREAST	0.880785
BC3C_URINARY_TRACT	0.711521
BCPAP_THYROID	0.817322
BDCM_HAEMATOPOIETIC_AND_LYMPHOID_TISSUE	0.821808
BECKER_CENTRAL_NERVOUS_SYSTEM	0.672862
BEN_LUNG	0.800586
BFTC905_URINARY_TRACT	0.504877
BFTC909_KIDNEY	0.791169
BHT101_THYROID	0.87116
BHY_UPPER_AERODIGESTIVE_TRACT	0.606098
BICR16_UPPER_AERODIGESTIVE_TRACT	0.618766
BICR18_UPPER_AERODIGESTIVE_TRACT	0.712949
BICR22_UPPER_AERODIGESTIVE_TRACT	0.707054
BICR31_UPPER_AERODIGESTIVE_TRACT	0.632865
BICR56_UPPER_AERODIGESTIVE_TRACT	0.437135
BICR6_UPPER_AERODIGESTIVE_TRACT	0.479964
BICR78_UPPER_AERODIGESTIVE_TRACT	0.472831
BL2_HAEMATOPOIETIC_AND_LYMPHOID_TISSUE	0.549412
BLUE1_HAEMATOPOIETIC_AND_LYMPHOID_TISSUE	0.908785
BOKU_CERVIX	0.686675
BONNA12_HAEMATOPOIETIC_AND_LYMPHOID_TISSUE	0.593328
BT12_SOFT_TISSUE	0.541467
BT16_SOFT_TISSUE	0.642318
BT474_BREAST	0.824949
BT549_BREAST	0.819367
BV173_HAEMATOPOIETIC_AND_LYMPHOID_TISSUE	0.480726
BXPC3_PANCREAS	0.910137
C32_SKIN	0.808435
C33A_CERVIX	0.900135
C4I_CERVIX	0.671885
C75_LARGE_INTESTINE	0.909206
C80_LARGE_INTESTINE	0.53748
C8166_HAEMATOPOIETIC_AND_LYMPHOID_TISSUE	0.687419
CADOES1_BONE	0.960585
CAKI1_KIDNEY	0.786656
CAL120_BREAST	0.795855
CAL12T_LUNG	0.626485
CAL148_BREAST	1
CAL27_UPPER_AERODIGESTIVE_TRACT	0.513488
CAL29_URINARY_TRACT	0.495644
CAL33_UPPER_AERODIGESTIVE_TRACT	0.548583
CAL51_BREAST	0.761811
CAL54_KIDNEY	1
CAL62_THYROID	0.844402
CAL72_BONE	0.860644
CAL78_BONE	0.904743
CALU1_LUNG	0.591164
CALU6_LUNG	0.688857
CAMA1_BREAST	1
CAOV3_OVARY	0.802883
CAPAN2_PANCREAS	0.372402
CAS1_CENTRAL_NERVOUS_SYSTEM	0.872592
CASKI_CERVIX	0.701651
CBAGPN_BONE	0.584342
CCFSTTG1_CENTRAL_NERVOUS_SYSTEM	0.84447
CCK81_LARGE_INTESTINE	0.826761
CCLP1_BILIARY_TRACT	0.681636
CCSW1_BILIARY_TRACT	0.655465
CFPAC1_PANCREAS	0.535097
CH157MN_CENTRAL_NERVOUS_SYSTEM	0.639675
CHAGOK1_LUNG	0.48899
CHL1_SKIN	0.624437
CHLA06ATRT_SOFT_TISSUE	0.559286
CHLA10_BONE	0.798172
CHLA15_AUTONOMIC_GANGLIA	0.603922
CHLA200_CENTRAL_NERVOUS_SYSTEM	0.654351
CHLA57_BONE	0.700651
CJM_SKIN	0.583474
CL11_LARGE_INTESTINE	0.498167
CMLT1_HAEMATOPOIETIC_AND_LYMPHOID_TISSUE	0.633252
COGAR359_SOFT_TISSUE	0.781803
COGE352_BONE	0.951554
COGN278_AUTONOMIC_GANGLIA	0.484557
COLO320_LARGE_INTESTINE	0.668106
COLO668_LUNG	0.648354
COLO678_LARGE_INTESTINE	0.715275
COLO679_SKIN	0.858004
COLO680N_OESOPHAGUS	0.685756
COLO741_SKIN	1
COLO783_SKIN	0.889327
COLO792_SKIN	0.700672
COLO800_SKIN	0.712495
CORL105_LUNG	0.708473
CORL23_LUNG	0.592062
CORL279_LUNG	0.724796
CORL88_LUNG	0.56244
COV318_OVARY	0.863341
COV362_OVARY	0.784875
COV434_OVARY	0.990001
COV644_OVARY	0.777115
CW2_LARGE_INTESTINE	0.99
CW9019_SOFT_TISSUE	0.665105
DANG_PANCREAS	0.395456
DAOY_CENTRAL_NERVOUS_SYSTEM	0.714571
DBTRG05MG_CENTRAL_NERVOUS_SYSTEM	0.923278
DEL_HAEMATOPOIETIC_AND_LYMPHOID_TISSUE	0.778241
DETROIT562_UPPER_AERODIGESTIVE_TRACT	0.49546
DKMG_CENTRAL_NERVOUS_SYSTEM	0.935685
DL_SOFT_TISSUE	0.548228
DMS273_LUNG	0.829868
DMS53_LUNG	0.919534
DMS79_LUNG	0.97084
DND41_HAEMATOPOIETIC_AND_LYMPHOID_TISSUE	0.66201
DOHH2_HAEMATOPOIETIC_AND_LYMPHOID_TISSUE	0.79399
DOTC24510_CERVIX	0.547869
DU145_PROSTATE	0.771703
DU4475_BREAST	0.727826
DV90_LUNG	0.374167
EB1_HAEMATOPOIETIC_AND_LYMPHOID_TISSUE	0.751596
EBC1_LUNG	0.477253
ECC10_STOMACH	0.614484
ECC2_BILIARY_TRACT	0.751017
ECGI10_OESOPHAGUS	0.537499
EFE184_ENDOMETRIUM	0.71625
EFM19_BREAST	0.939512
EFM192A_BREAST	1
EFO21_OVARY	0.641614
EFO27_OVARY	0.699463
EGI1_BILIARY_TRACT	0.525813
EKVX_LUNG	0.700707
EM2_HAEMATOPOIETIC_AND_LYMPHOID_TISSUE	0.586142
EMTOKA_ENDOMETRIUM	0.676885
EN_ENDOMETRIUM	0.881987
ES2_OVARY	0.914468
ESS1_ENDOMETRIUM	0.564748
EW8_BONE	0.698141
EWS502_BONE	0.648333
FADU_UPPER_AERODIGESTIVE_TRACT	0.668729
FLO1_OESOPHAGUS	1
FTC133_THYROID	0.567067
FTC238_THYROID	0.961141
G292CLONEA141B1	0.924978
G292CLONEA141B1_BONE	0.831051
G361_SKIN	1
G401_SOFT_TISSUE	0.910426
G402_SOFT_TISSUE	0.90285
G415_BILIARY_TRACT	0.596005
GAMG_CENTRAL_NERVOUS_SYSTEM	0.653871
GB1_CENTRAL_NERVOUS_SYSTEM	1
GB2_BILIARY_TRACT	0.504468
GCIY_STOMACH	0.778419
GCT_SOFT_TISSUE	0.89129
GCT27_TESTIS	0.689321
GI1_CENTRAL_NERVOUS_SYSTEM	0.709966
GIMEN_AUTONOMIC_GANGLIA	0.7996
GOS3_CENTRAL_NERVOUS_SYSTEM	0.779654
GP2D_LARGE_INTESTINE	0.661838
GP5D_LARGE_INTESTINE	0.694858
GRANTA519_HAEMATOPOIETIC_AND_LYMPHOID_TISSUE	0.848548
GSS_STOMACH	0.67229
GSU_STOMACH	0.327692
H103_UPPER_AERODIGESTIVE_TRACT	0.579033
H157_UPPER_AERODIGESTIVE_TRACT	0.537208
H357_UPPER_AERODIGESTIVE_TRACT	0.426836
H376_UPPER_AERODIGESTIVE_TRACT	0.58989
H4_CENTRAL_NERVOUS_SYSTEM	0.813385
H413_UPPER_AERODIGESTIVE_TRACT	0.58972
HA1E_KIDNEY	0.831955
HAC2_OVARY	0.686128
HARA_LUNG	0.573311
HCA1_CERVIX	0.768235
HCC1143_BREAST	0.646444
HCC1195_LUNG	0.588293
HCC1359_LUNG	0.773819
HCC1395_BREAST	0.702669
HCC1419_BREAST	0.719945
HCC1428_BREAST	0.770637
HCC1438_LUNG	0.907558
HCC15_LUNG	0.736119
HCC1806_BREAST	0.843447
HCC1937_BREAST	0.894193
HCC1954_BREAST	0.624683
HCC2108_LUNG	0.594817
HCC33_LUNG	1
HCC38_BREAST	0.835316
HCC4006_LUNG	0.442411
HCC44_LUNG	0.550906
HCC515_LUNG	0.907535
HCC56_LARGE_INTESTINE	0.33545
HCC78_LUNG	0.609179
HCC827_LUNG	0.641266
HCC95_LUNG	0.584815
HCSC1_CERVIX	0.975491
HCT116_LARGE_INTESTINE	0.619525
HCT15_LARGE_INTESTINE	0.815645
HDMB03_CENTRAL_NERVOUS_SYSTEM	0.70782
HDMYZ_HAEMATOPOIETIC_AND_LYMPHOID_TISSUE	0.731814
HDQP1_BREAST	0.527384
HEC1_ENDOMETRIUM	0.78118
HEC108_ENDOMETRIUM	0.706809
HEC116_ENDOMETRIUM	0.647939
HEC151_ENDOMETRIUM	0.767338
HEC1A_ENDOMETRIUM	0.66976
HEC1B_ENDOMETRIUM	0.591353
HEC251_ENDOMETRIUM	0.603029
HEC265_ENDOMETRIUM	0.882226
HEC59_ENDOMETRIUM	1
HEC6_ENDOMETRIUM	0.833712
HEL_HAEMATOPOIETIC_AND_LYMPHOID_TISSUE	0.775332
HEL9217_HAEMATOPOIETIC_AND_LYMPHOID_TISSUE	0.680837
HEP3B217_LIVER	0.833387
HEPG2_LIVER	0.52082
HEYA8_OVARY	0.650046
HGC27_STOMACH	0.765443
HH_HAEMATOPOIETIC_AND_LYMPHOID_TISSUE	0.948582
HKA1_SKIN	0.758289
HKGZCC_BILIARY_TRACT	0.376837
HLF_LIVER	0.610408
HMC18_BREAST	0.326415
HOS_BONE	0.741236
HOTHC_THYROID	0.883837
HPAC_PANCREAS	0.506952
HPAFII_PANCREAS	0.431011
HPBALL_HAEMATOPOIETIC_AND_LYMPHOID_TISSUE	1
HS294T_SKIN	0.896406
HS611T_HAEMATOPOIETIC_AND_LYMPHOID_TISSUE	0.984367
HS683_CENTRAL_NERVOUS_SYSTEM	0.677811
HS729_SOFT_TISSUE	0.858631
HS766T_PANCREAS	0.395391
HS852T_SKIN	0.920672
HS939T_SKIN	0.992614
HS944T_SKIN	0.614211
HSC1_SKIN	0.606047
HSC2_UPPER_AERODIGESTIVE_TRACT	0.607313
HSC3_UPPER_AERODIGESTIVE_TRACT	0.569747
HSC5_SKIN	0.603561
HSKTC_OVARY	0.95274
HT_HAEMATOPOIETIC_AND_LYMPHOID_TISSUE	0.751129
HT1080_SOFT_TISSUE	0.579081
HT115_LARGE_INTESTINE	0.705387
HT1197_URINARY_TRACT	0.815861
HT1376_URINARY_TRACT	0.618571
HT144_SKIN	0.939981
HT29_LARGE_INTESTINE	0.903455
HT3_CERVIX	0.673644
HT55_LARGE_INTESTINE	0.733152
HTMMT_ENDOMETRIUM	0.860318
HUCCT1_BILIARY_TRACT	0.434256
HUG1N_STOMACH	0.817583
HUH1_LIVER	0.790108
HUH28_BILIARY_TRACT	0.884945
HUH6_LIVER	0.75181
HUH7_LIVER	0.902963
HUO9_BONE	1
HUPT3_PANCREAS	0.397977
HUPT4_PANCREAS	0.339074
IALM_LUNG	0.478726
ICC10_BILIARY_TRACT	0.486614
ICC12_BILIARY_TRACT	0.832995
ICC137_BILIARY_TRACT	0.669589
ICC4_BILIARY_TRACT	0.976306
ICC8_BILIARY_TRACT	0.860331
ICC9_BILIARY_TRACT	0.485491
IGR1_SKIN	0.898371
IGR37_SKIN	0.920453
IGR39_SKIN	0.899204
IGROV1_OVARY	0.767557
IHH4_THYROID	0.920291
IM95_STOMACH	0.517317
IPC298_SKIN	0.360928
ISHIKAWAHERAKLIO02ER_ENDOMETRIUM	0.831821
ISTMES2_PLEURA	1
J82_URINARY_TRACT	0.801028
JAR_PLACENTA	0.772101
JEG3_PLACENTA	0.906083
JEKO1_HAEMATOPOIETIC_AND_LYMPHOID_TISSUE	0.8433
JHH1_LIVER	0.496018
JHH4_LIVER	0.850031
JHH5_LIVER	0.56442
JHH6_LIVER	0.740288
JHH7_LIVER	0.796775
JHOC5_OVARY	0.721845
JHOM1_OVARY	0.854463
JHOS2_OVARY	0.773251
JHUEM2_ENDOMETRIUM	0.860489
JHUEM7_ENDOMETRIUM	0.619955
JIMT1_BREAST	0.726056
JJN3_HAEMATOPOIETIC_AND_LYMPHOID_TISSUE	0.64991
JL1_PLEURA	0.583963
JM1_HAEMATOPOIETIC_AND_LYMPHOID_TISSUE	0.838826
JMSU1_URINARY_TRACT	0.83015
JMURTK2_SOFT_TISSUE	1
JOPACA1_PANCREAS	0.4149
JR_SOFT_TISSUE	0.603228
JURKAT_HAEMATOPOIETIC_AND_LYMPHOID_TISSUE	1
JURLMK1_HAEMATOPOIETIC_AND_LYMPHOID_TISSUE	0.536488
JVM3_HAEMATOPOIETIC_AND_LYMPHOID_TISSUE	0.760748
K029AX_SKIN	0.926859
K562_HAEMATOPOIETIC_AND_LYMPHOID_TISSUE	0.606956
KALS1_CENTRAL_NERVOUS_SYSTEM	0.860884
KARPAS1718_HAEMATOPOIETIC_AND_LYMPHOID_TISSUE	0.936967
KARPAS299_HAEMATOPOIETIC_AND_LYMPHOID_TISSUE	0.483642
KARPAS620_HAEMATOPOIETIC_AND_LYMPHOID_TISSUE	0.542341
KATOIII_STOMACH	0.609162
KCL22_HAEMATOPOIETIC_AND_LYMPHOID_TISSUE	0.780086
KD_SOFT_TISSUE	0.923754
KE37_HAEMATOPOIETIC_AND_LYMPHOID_TISSUE	0.694198
KE39_STOMACH	0.658742
KE97_STOMACH	0.810279
KELLY_AUTONOMIC_GANGLIA	0.845202
KHM1B_HAEMATOPOIETIC_AND_LYMPHOID_TISSUE	0.403643
KKU055_BILIARY_TRACT	0.985129
KKU100_BILIARY_TRACT	0.508013
KKU213_BILIARY_TRACT	0.642103
KLE_ENDOMETRIUM	1
KMBC2_URINARY_TRACT	0.463735
KMCH1_BILIARY_TRACT	0.754297
KMH2_HAEMATOPOIETIC_AND_LYMPHOID_TISSUE	0.980698
KMRC1_KIDNEY	1
KMRC20_KIDNEY	0.784769
KMRC3_KIDNEY	0.915121
KMS11_HAEMATOPOIETIC_AND_LYMPHOID_TISSUE	0.831456
KMS12BM_HAEMATOPOIETIC_AND_LYMPHOID_TISSUE	0.878668
KMS18_HAEMATOPOIETIC_AND_LYMPHOID_TISSUE	0.460651
KMS21BM_HAEMATOPOIETIC_AND_LYMPHOID_TISSUE	0.538479
KMS27_HAEMATOPOIETIC_AND_LYMPHOID_TISSUE	0.466745
KMS28BM_HAEMATOPOIETIC_AND_LYMPHOID_TISSUE	0.765226
KMS34_HAEMATOPOIETIC_AND_LYMPHOID_TISSUE	0.846285
KNS42_CENTRAL_NERVOUS_SYSTEM	0.851701
KNS60_CENTRAL_NERVOUS_SYSTEM	0.838834
KNS62_LUNG	0.535218
KNS81_CENTRAL_NERVOUS_SYSTEM	0.592084
KON_UPPER_AERODIGESTIVE_TRACT	0.472584
KOPN8_HAEMATOPOIETIC_AND_LYMPHOID_TISSUE	0.471755
KOSC2CL343_UPPER_AERODIGESTIVE_TRACT	0.553908
KP2_PANCREAS	0.38669
KP3_PANCREAS	0.58171
KP4_PANCREAS	0.667702
KPNYN_AUTONOMIC_GANGLIA	0.997578
KS1_CENTRAL_NERVOUS_SYSTEM	0.600574
KU1919_URINARY_TRACT	0.435162
KU812_HAEMATOPOIETIC_AND_LYMPHOID_TISSUE	0.598919
KURAMOCHI_OVARY	0.942218
KYM1_SOFT_TISSUE	0.623678
KYO1_HAEMATOPOIETIC_AND_LYMPHOID_TISSUE	0.586969
KYSE140_OESOPHAGUS	0.721204
KYSE150_OESOPHAGUS	0.659777
KYSE180_OESOPHAGUS	0.829897
KYSE270_OESOPHAGUS	0.661202
KYSE30_OESOPHAGUS	0.57487
KYSE410_OESOPHAGUS	0.509832
KYSE450_OESOPHAGUS	0.508917
KYSE510_OESOPHAGUS	0.623478
KYSE520_OESOPHAGUS	0.634216
KYSE70_OESOPHAGUS	0.645483
L33_PANCREAS	0.537506
L363_HAEMATOPOIETIC_AND_LYMPHOID_TISSUE	0.725746
L82_HAEMATOPOIETIC_AND_LYMPHOID_TISSUE	0.478314
LAMA84_HAEMATOPOIETIC_AND_LYMPHOID_TISSUE	0.641651
LC1SQSF_LUNG	0.782938
LCLC103H_LUNG	0.822053
LI7_LIVER	0.660987
LK2_LUNG	0.533704
LMSU_STOMACH	0.660657
LN18_CENTRAL_NERVOUS_SYSTEM	0.811424
LN229_CENTRAL_NERVOUS_SYSTEM	0.745518
LN382_CENTRAL_NERVOUS_SYSTEM	0.666383
LN464_CENTRAL_NERVOUS_SYSTEM	0.88683
LNCAPCLONEFGC_PROSTATE	0.839074
LNZ308_CENTRAL_NERVOUS_SYSTEM	0.604101
LOUNH91_LUNG	0.451276
LOVO_LARGE_INTESTINE	0.647523
LOXIMVI_SKIN	0.897913
LPS141_SOFT_TISSUE	0.930358
LS_AUTONOMIC_GANGLIA	0.905712
LS1034_LARGE_INTESTINE	0.608644
LS180_LARGE_INTESTINE	0.53185
LS411N_LARGE_INTESTINE	0.962844
LS513_LARGE_INTESTINE	0.58806
LU99_LUNG	0.457652
LUDLU1_LUNG	0.586583
LXF289_LUNG	0.690713
M059K_CENTRAL_NERVOUS_SYSTEM	0.762165
MALME3M_SKIN	1
MB1_THYROID	0.734169
MC116_HAEMATOPOIETIC_AND_LYMPHOID_TISSUE	0.91803
MCAS_OVARY	0.625575
MCC142_SKIN	0.724435
MCC26_SKIN	0.917
MCF7_BREAST	0.829638
MDAMB175VII_BREAST	0.53308
MDAMB231_BREAST	0.64418
MDAMB361_BREAST	0.857154
MDAMB435S_SKIN	0.996095
MDAMB436_BREAST	0.840674
MDAMB453_BREAST	0.730977
MDAMB468_BREAST	0.712649
MDST8_LARGE_INTESTINE	0.947333
MEG01_HAEMATOPOIETIC_AND_LYMPHOID_TISSUE	0.484595
MEL285_UVEA	0.729538
MEL290_UVEA	0.892778
MELHO_SKIN	1
MELJUSO_SKIN	0.39824
MEWO_SKIN	0.720878
MFE280_ENDOMETRIUM	0.675374
MFE296_ENDOMETRIUM	0.835578
MFE319_ENDOMETRIUM	0.994051
MG63_BONE	0.886649
MHHES1_BONE	0.822765
MHHNB11_AUTONOMIC_GANGLIA	0.712352
MIAPACA2_PANCREAS	0.358801
MKN1_STOMACH	0.661859
MKN45_STOMACH	0.333722
MKN7_STOMACH	0.594809
MKN74_STOMACH	0.829789
MM127_SKIN	0.726606
MMNK1_BILIARY_TRACT	0.999041
MOLM13_HAEMATOPOIETIC_AND_LYMPHOID_TISSUE	0.377591
MOLP2_HAEMATOPOIETIC_AND_LYMPHOID_TISSUE	0.849002
MOLT16_HAEMATOPOIETIC_AND_LYMPHOID_TISSUE	0.567472
MOLT3_HAEMATOPOIETIC_AND_LYMPHOID_TISSUE	0.84142
MON_SOFT_TISSUE	0.322219
MONOMAC1_HAEMATOPOIETIC_AND_LYMPHOID_TISSUE	0.669692
MONOMAC6_HAEMATOPOIETIC_AND_LYMPHOID_TISSUE	0.700365
MP41_UVEA	0.861388
MPP89_PLEURA	0.992406
MS751_CERVIX	0.735025
MSTO211H_PLEURA	0.649214
NALM6_HAEMATOPOIETIC_AND_LYMPHOID_TISSUE	0.835119
NB1_AUTONOMIC_GANGLIA	0.634221
NB4_HAEMATOPOIETIC_AND_LYMPHOID_TISSUE	0.52664
NCCIT_TESTIS	1
NCIH1048_LUNG	0.667537
NCIH1092_LUNG	0.627137
NCIH1299_LUNG	0.688944
NCIH1339_LUNG	0.684944
NCIH1341_LUNG	0.621373
NCIH1355_LUNG	0.659611
NCIH1373_LUNG	0.510744
NCIH1437_LUNG	0.791692
NCIH1563_LUNG	0.714369
NCIH1568_LUNG	0.775531
NCIH1573_LUNG	0.686584
NCIH1581_LUNG	0.79721
NCIH1623_LUNG	0.864904
NCIH1648_LUNG	0.307055
NCIH1650_LUNG	0.79698
NCIH1651_LUNG	0.904345
NCIH1693_LUNG	0.67838
NCIH1694_LUNG	0.766956
NCIH1703_LUNG	0.740704
NCIH1792_LUNG	0.497822
NCIH1793_LUNG	0.656585
NCIH1838_LUNG	0.583482
NCIH1876_LUNG	1
NCIH1915_LUNG	0.737374
NCIH1944_LUNG	0.636329
NCIH196_LUNG	1
NCIH1975_LUNG	0.685787
NCIH2004RT_SOFT_TISSUE	0.778598
NCIH2009_LUNG	0.646854
NCIH2023_LUNG	0.618156
NCIH2052_PLEURA	0.575502
NCIH2077_LUNG	0.708157
NCIH2087_LUNG	0.629979
NCIH211_LUNG	0.81826
NCIH2110_LUNG	0.705187
NCIH2122_LUNG	0.5463
NCIH2126_LUNG	0.761883
NCIH2170_LUNG	0.710257
NCIH2171_LUNG	0.947771
NCIH2172_LUNG	0.832812
NCIH2228_LUNG	0.5732
NCIH226_LUNG	0.705025
NCIH23_LUNG	0.625206
NCIH2347_LUNG	0.395554
NCIH2444_LUNG	0.49668
NCIH2452_PLEURA	0.990344
NCIH28_PLEURA	0.838372
NCIH292_LUNG	0.615323
NCIH322_LUNG	0.622718
NCIH358_LUNG	0.294131
NCIH441_LUNG	0.471088
NCIH446_LUNG	0.973876
NCIH460_LUNG	0.418254
NCIH508_LARGE_INTESTINE	0.684722
NCIH520_LUNG	0.809737
NCIH522_LUNG	0.902492
NCIH524_LUNG	0.906319
NCIH596_LUNG	0.700453
NCIH647_LUNG	0.763404
NCIH650_LUNG	0.661312
NCIH661_LUNG	0.827802
NCIH727_LUNG	0.635865
NCIH747_LARGE_INTESTINE	0.39213
NCIH82_LUNG	0.849202
NCIH838_LUNG	0.845483
NCIH841_LUNG	0.940988
NCIN87_STOMACH	0.579784
NCO2_HAEMATOPOIETIC_AND_LYMPHOID_TISSUE	0.73311
NIHOVCAR3_OVARY	0.76356
NOMO1_HAEMATOPOIETIC_AND_LYMPHOID_TISSUE	0.393537
NOZ_LIVER	0.58028
NP2_CENTRAL_NERVOUS_SYSTEM	0.995567
NP3_CENTRAL_NERVOUS_SYSTEM	0.830628
NP5_CENTRAL_NERVOUS_SYSTEM	0.925965
NUDHL1_HAEMATOPOIETIC_AND_LYMPHOID_TISSUE	0.300772
NUGC3_STOMACH	0.405607
NUGC4_STOMACH	0.499554
NZOV9_OVARY	0.645238
OACM51_OESOPHAGUS	0.508265
OAW42_OVARY	0.603787
OC314_OVARY	0.850957
OC316_OVARY	0.855546
OCIAML2_HAEMATOPOIETIC_AND_LYMPHOID_TISSUE	0.648735
OCIAML3_HAEMATOPOIETIC_AND_LYMPHOID_TISSUE	0.305912
OCIAML5_HAEMATOPOIETIC_AND_LYMPHOID_TISSUE	0.514677
OCIC4P_OVARY	0.866131
OCIC5X_OVARY	0.778156
OCILY132_HAEMATOPOIETIC_AND_LYMPHOID_TISSUE	0.858067
OCILY18_HAEMATOPOIETIC_AND_LYMPHOID_TISSUE	0.670086
OCILY19_HAEMATOPOIETIC_AND_LYMPHOID_TISSUE	0.438065
OCILY3_HAEMATOPOIETIC_AND_LYMPHOID_TISSUE	0.884808
OCIM1_HAEMATOPOIETIC_AND_LYMPHOID_TISSUE	0.60922
OCIP5X_OVARY	0.931517
OCUG1_BILIARY_TRACT	0.507908
OE19_OESOPHAGUS	0.58845
OE21_OESOPHAGUS	0.689056
OE33_OESOPHAGUS	0.604394
ONCODG1_OVARY	0.878235
ONDA9_CENTRAL_NERVOUS_SYSTEM	0.797077
ONS76_CENTRAL_NERVOUS_SYSTEM	0.491363
OSC20_UPPER_AERODIGESTIVE_TRACT	0.658246
OSRC2_KIDNEY	0.87519
OUMS23_LARGE_INTESTINE	0.945278
OV17R_OVARY	0.99
OV56_OVARY	0.807509
OV7_OVARY	0.541316
OVCAR8_OVARY	0.879062
OVISE_OVARY	0.844858
OVK18_OVARY	0.828885
OVKATE_OVARY	0.956335
OVTOKO_OVARY	0.802276
OZ_BILIARY_TRACT	0.544205
P12ICHIKAWA_HAEMATOPOIETIC_AND_LYMPHOID_TISSUE	0.418305
PA1_OVARY	0.959936
PACADD119_PANCREAS	0.642353
PACADD137_PANCREAS	0.657395
PACADD161_PANCREAS	0.374549
PANC0203_PANCREAS	0.443805
PANC0327_PANCREAS	0.440595
PANC0403_PANCREAS	0.46906
PANC0504_PANCREAS	0.389058
PANC0813_PANCREAS	0.603189
PANC1_PANCREAS	0.856094
PANC1005_PANCREAS	0.571588
PATU8902_PANCREAS	0.564177
PATU8988S_PANCREAS	0.312409
PATU8988T_PANCREAS	0.669762
PC14_LUNG	0.632858
PC3_PROSTATE	0.956657
PEA1_OVARY	0.942533
PECAPJ15_UPPER_AERODIGESTIVE_TRACT	0.61571
PECAPJ41CLONED2_UPPER_AERODIGESTIVE_TRACT	0.590166
PECAPJ49_UPPER_AERODIGESTIVE_TRACT	0.532368
PEDS005TPFAD_KIDNEY	0.523022
PEDS005TSUSP_KIDNEY	0.671063
PEDS015T_SOFT_TISSUE	0.833485
PF382_HAEMATOPOIETIC_AND_LYMPHOID_TISSUE	0.68107
PFSK1_CENTRAL_NERVOUS_SYSTEM	1
PK1_PANCREAS	0.516724
PK45H_PANCREAS	0.632784
PK59_PANCREAS	0.597786
PK8_PANCREAS	0.434371
PL21_HAEMATOPOIETIC_AND_LYMPHOID_TISSUE	0.459433
PLCPRF5_LIVER	0.730501
PMFKO14_LARGE_INTESTINE	0.416904
PSN1_PANCREAS	0.375142
QGP1_PANCREAS	0.544129
RBE_BILIARY_TRACT	0.480865
RCC10RGB_KIDNEY	0.880086
RCHACV_HAEMATOPOIETIC_AND_LYMPHOID_TISSUE	0.896684
RCK8_HAEMATOPOIETIC_AND_LYMPHOID_TISSUE	0.796599
RCM1_LARGE_INTESTINE	0.330233
RD_SOFT_TISSUE	0.397437
RDES_BONE	0.912193
RERFGC1B_STOMACH	0.680907
RERFLCAD1_LUNG	0.770704
RERFLCAD2_LUNG	0.439738
RERFLCAI_LUNG	0.737793
RERFLCKJ_LUNG	0.893301
RERFLCMS_LUNG	0.867761
RH28_SOFT_TISSUE	1
RH30_SOFT_TISSUE	0.761117
RH36_SOFT_TISSUE	0.574497
RH4_SOFT_TISSUE	0.879252
RI1_HAEMATOPOIETIC_AND_LYMPHOID_TISSUE	0.781317
RKN_SOFT_TISSUE	0.316421
RKO_LARGE_INTESTINE	0.883786
RL_HAEMATOPOIETIC_AND_LYMPHOID_TISSUE	0.697952
RL952_ENDOMETRIUM	0.389914
RMGI_OVARY	0.619462
RMSYM_SOFT_TISSUE	0.868534
RMUGS_OVARY	0.851305
RO82W1_THYROID	0.649905
RPMI7951_SKIN	0.883501
RPMI8402_HAEMATOPOIETIC_AND_LYMPHOID_TISSUE	0.832464
RT112_URINARY_TRACT	0.311918
RT4_URINARY_TRACT	0.547405
RVH421_SKIN	0.827127
S117_THYROID	0.606858
SAOS2_BONE	1
SBC5_LUNG	0.785057
SCABER_URINARY_TRACT	0.572611
SCC25_UPPER_AERODIGESTIVE_TRACT	0.551981
SCC3_HAEMATOPOIETIC_AND_LYMPHOID_TISSUE	0.536773
SCC9_UPPER_AERODIGESTIVE_TRACT	0.407484
SCLC21H_LUNG	0.794586
SEM_HAEMATOPOIETIC_AND_LYMPHOID_TISSUE	0.78241
SF126_CENTRAL_NERVOUS_SYSTEM	0.828901
SF295_CENTRAL_NERVOUS_SYSTEM	0.77704
SF539_CENTRAL_NERVOUS_SYSTEM	0.65963
SG231_BILIARY_TRACT	0.218681
SH10TC_STOMACH	0.621436
SH4_SKIN	0.904693
SHMAC5_PROSTATE	0.455966
SHP77_LUNG	0.873033
SIMA_AUTONOMIC_GANGLIA	0.82413
SISO_CERVIX	0.481734
SJSA1_BONE	0.616736
SKES1_BONE	0.828732
SKGI_ENDOMETRIUM	0.60937
SKGII_ENDOMETRIUM	0.717207
SKGT2_STOMACH	0.641887
SKGT4_OESOPHAGUS	0.457442
SKHEP1_LIVER	0.847888
SKLMS1_SOFT_TISSUE	0.629164
SKLU1_LUNG	0.438961
SKM1_HAEMATOPOIETIC_AND_LYMPHOID_TISSUE	0.238065
SKMEL2_SKIN	0.710953
SKMEL24_SKIN	0.781834
SKMEL28_SKIN	1
SKMEL3_SKIN	1
SKMEL30_SKIN	0.551968
SKMEL5_SKIN	0.873165
SKMES1_LUNG	0.685202
SKN_ENDOMETRIUM	0.656931
SKNAS_AUTONOMIC_GANGLIA	0.537251
SKNBE2_AUTONOMIC_GANGLIA	0.61917
SKNDZ_AUTONOMIC_GANGLIA	0.838519
SKNEP1_BONE	0.819808
SKNFI_AUTONOMIC_GANGLIA	0.825118
SKNMC_BONE	0.816058
SKNO1_HAEMATOPOIETIC_AND_LYMPHOID_TISSUE	0.61829
SKOV3_OVARY	0.877609
SKPNDW_BONE	0.76734
SKUT1_SOFT_TISSUE	0.881474
SMSCTR_SOFT_TISSUE	0.496122
SNB75_CENTRAL_NERVOUS_SYSTEM	0.693987
SNGM_ENDOMETRIUM	0.685125
SNU1_STOMACH	0.576703
SNU1041_UPPER_AERODIGESTIVE_TRACT	0.544836
SNU1066_UPPER_AERODIGESTIVE_TRACT	0.623289
SNU1076_UPPER_AERODIGESTIVE_TRACT	0.482818
SNU1077_ENDOMETRIUM	0.889865
SNU1079_BILIARY_TRACT	0.900697
SNU1105_CENTRAL_NERVOUS_SYSTEM	0.675808
SNU119_OVARY	0.739015
SNU1196_BILIARY_TRACT	0.939588
SNU1214_UPPER_AERODIGESTIVE_TRACT	0.456926
SNU1544_LARGE_INTESTINE	0.655412
SNU182_LIVER	1
SNU201_CENTRAL_NERVOUS_SYSTEM	0.833095
SNU213_PANCREAS	0.398393
SNU216_STOMACH	0.641142
SNU2372_BREAST	0.994133
SNU245_BILIARY_TRACT	0.759265
SNU308_BILIARY_TRACT	0.630631
SNU398_LIVER	1
SNU407_LARGE_INTESTINE	0.658486
SNU410_PANCREAS	0.743645
SNU423_LIVER	0.737046
SNU449_LIVER	0.858585
SNU46_UPPER_AERODIGESTIVE_TRACT	0.655318
SNU466_CENTRAL_NERVOUS_SYSTEM	0.535438
SNU489_CENTRAL_NERVOUS_SYSTEM	0.785018
SNU601_STOMACH	0.569139
SNU61_LARGE_INTESTINE	0.3873
SNU638_STOMACH	0.668129
SNU668_STOMACH	0.654495
SNU685_ENDOMETRIUM	0.856586
SNU719_STOMACH	0.53958
SNU761_LIVER	0.991637
SNU81_LARGE_INTESTINE	0.755922
SNU840_OVARY	0.580724
SNU869_BILIARY_TRACT	0.585985
SNU878_LIVER	0.747386
SNU886_LIVER	0.611059
SNU899_UPPER_AERODIGESTIVE_TRACT	0.349677
SNUC2A_LARGE_INTESTINE	0.958528
SNUC4_LARGE_INTESTINE	0.796594
SQ1_LUNG	0.583956
SR786_HAEMATOPOIETIC_AND_LYMPHOID_TISSUE	0.692423
SSP25_BILIARY_TRACT	0.843815
STM9101_SOFT_TISSUE	0.95492
SUDHL1_HAEMATOPOIETIC_AND_LYMPHOID_TISSUE	0.446139
SUDHL4_HAEMATOPOIETIC_AND_LYMPHOID_TISSUE	0.786248
SUDHL8_HAEMATOPOIETIC_AND_LYMPHOID_TISSUE	0.977006
SUIT2_PANCREAS	0.794471
SUM149PT_BREAST	0.492066
SUM159PT_BREAST	0.75291
SUPB15_HAEMATOPOIETIC_AND_LYMPHOID_TISSUE	0.640915
SUPT11_HAEMATOPOIETIC_AND_LYMPHOID_TISSUE	0.979934
SUSA_TESTIS	0.552585
SW1088_CENTRAL_NERVOUS_SYSTEM	0.682677
SW1116_LARGE_INTESTINE	0.802676
SW1271_LUNG	0.650079
SW13_ADRENAL_CORTEX	0.697402
SW1353_BONE	0.886264
SW1463_LARGE_INTESTINE	0.421825
SW156_KIDNEY	0.98603
SW1573_LUNG	0.544847
SW1710_URINARY_TRACT	0.81058
SW1783_CENTRAL_NERVOUS_SYSTEM	0.73685
SW1990_PANCREAS	0.734298
SW480_LARGE_INTESTINE	0.446753
SW620_LARGE_INTESTINE	0.326598
SW626_LARGE_INTESTINE	0.359484
SW756_CERVIX	0.446154
SW780_URINARY_TRACT	0.633876
SW837_LARGE_INTESTINE	0.677924
SW900_LUNG	0.549995
SW948_LARGE_INTESTINE	0.498045
SW954_CERVIX	0.528602
T24_URINARY_TRACT	0.732123
T3M10_LUNG	0.806316
T3M5_THYROID	0.863744
T47D_BREAST	0.807389
T84_LARGE_INTESTINE	0.5784
T98G_CENTRAL_NERVOUS_SYSTEM	0.792408
TALL1_HAEMATOPOIETIC_AND_LYMPHOID_TISSUE	0.593107
TANOUE_HAEMATOPOIETIC_AND_LYMPHOID_TISSUE	0.586941
TASK1_CENTRAL_NERVOUS_SYSTEM	0.849416
TC106_BONE	0.790938
TC205_BONE	0.813399
TC32_BONE	0.712574
TC71_BONE	0.747164
TCCPAN2_PANCREAS	0.603028
TCCSUP_URINARY_TRACT	0.674815
TE1_OESOPHAGUS	0.695566
TE10_OESOPHAGUS	0.62234
TE11_OESOPHAGUS	0.77485
TE14_OESOPHAGUS	0.622441
TE15_OESOPHAGUS	0.254086
TE4_OESOPHAGUS	0.564713
TE5_OESOPHAGUS	0.55589
TE6_OESOPHAGUS	0.562894
TE617T_SOFT_TISSUE	0.393504
TE8_OESOPHAGUS	0.52436
TE9_OESOPHAGUS	0.623154
TEN_ENDOMETRIUM	0.854233
TF1_HAEMATOPOIETIC_AND_LYMPHOID_TISSUE	0.407081
TFK1_BILIARY_TRACT	0.861712
TGBC18TKB_LARGE_INTESTINE	0.606791
TGBC1TKB_BILIARY_TRACT	0.857161
TGBC52TKB_BILIARY_TRACT	0.542976
TGW_AUTONOMIC_GANGLIA	0.540667
THP1_HAEMATOPOIETIC_AND_LYMPHOID_TISSUE	0.828019
TM31_CENTRAL_NERVOUS_SYSTEM	0.919537
TM87_SOFT_TISSUE	0.707227
TOV112D_OVARY	0.693262
TOV21G_OVARY	0.64219
TT_OESOPHAGUS	0.720925
TT_THYROID	1
TT1TKB_LARGE_INTESTINE	0.357915
TT2609C02_THYROID	0.533347
TTC1240_SOFT_TISSUE	0.652904
TTC442_SOFT_TISSUE	0.784034
TTC549_SOFT_TISSUE	0.728474
TTC642_SOFT_TISSUE	0.797386
TTC709_SOFT_TISSUE	0.771368
TYKNU_OVARY	0.52277
U118MG_CENTRAL_NERVOUS_SYSTEM	0.790794
U178_CENTRAL_NERVOUS_SYSTEM	0.755344
U251MG_CENTRAL_NERVOUS_SYSTEM	0.65354
U266B1_HAEMATOPOIETIC_AND_LYMPHOID_TISSUE	0.902272
U2940_HAEMATOPOIETIC_AND_LYMPHOID_TISSUE	0.86491
U2973_HAEMATOPOIETIC_AND_LYMPHOID_TISSUE	0.890717
U2OS_BONE	0.641872
U343_CENTRAL_NERVOUS_SYSTEM	0.721119
U87MG_CENTRAL_NERVOUS_SYSTEM	0.844184
U937_HAEMATOPOIETIC_AND_LYMPHOID_TISSUE	0.600839
UACC257_SKIN	0.82325
UACC62_SKIN	0.880806
UBLC1_URINARY_TRACT	0.482673
ULA_HAEMATOPOIETIC_AND_LYMPHOID_TISSUE	0.734005
UMRC3_KIDNEY	0.88554
UMRC7_KIDNEY	0.761653
UMUC1_URINARY_TRACT	0.590148
UMUC10_URINARY_TRACT	0.780166
UMUC11_URINARY_TRACT	0.731897
UMUC13_URINARY_TRACT	0.526985
UMUC5_URINARY_TRACT	0.482072
UMUC6_URINARY_TRACT	0.355725
UMUC7_URINARY_TRACT	0.690894
UO31_KIDNEY	0.863852
UPCISCC072_UPPER_AERODIGESTIVE_TRACT	0.630103
UPCISCC111_UPPER_AERODIGESTIVE_TRACT	0.500552
UPCISCC116_UPPER_AERODIGESTIVE_TRACT	0.397352
UW228_CENTRAL_NERVOUS_SYSTEM	0.572465
VAESBJ_SOFT_TISSUE	0.956598
VAL_HAEMATOPOIETIC_AND_LYMPHOID_TISSUE	0.825334
VMCUB1_URINARY_TRACT	0.513616
VMRCRCW_KIDNEY	0.916827
VMRCRCZ_KIDNEY	0.799016
WAOSEL_HAEMATOPOIETIC_AND_LYMPHOID_TISSUE	0.637241
WERIRB1_AUTONOMIC_GANGLIA	0.799492
WM1799_SKIN	0.894967
WM2664_SKIN	1
WM793_SKIN	0.821187
WM88_SKIN	0.84334
WM983B_SKIN	0.888948
WSUDLCL2_HAEMATOPOIETIC_AND_LYMPHOID_TISSUE	0.739838
YAPC_PANCREAS	0.383837
YD10B_UPPER_AERODIGESTIVE_TRACT	0.507111
YD15_SALIVARY_GLAND	0.606117
YD38_UPPER_AERODIGESTIVE_TRACT	0.390421
YD8_UPPER_AERODIGESTIVE_TRACT	0.679775
YH13_CENTRAL_NERVOUS_SYSTEM	0.865696
YKG1_CENTRAL_NERVOUS_SYSTEM	0.693227
YSCCC_BILIARY_TRACT	0.810796
ZR751_BREAST	0.889023
