# Supplementary material for: Concurrent inhibition of oncogenic and wild-type RAS-GTP for cancer therapy
Source: Research Square preprint supplement (doi:10.21203/rs.3.rs-3122478/v1), 2023-07-07
Supplement: Supplementary file 2 [file 18d9e3e20e22b2ba9c650077.docx]

**Extended Methods**

**Cell culture and reagents**

Most human cancer cell lines were obtained from ATCC (Pa14C and Pa16C cells were provided as a gift by Anirban Maitra (MD Anderson)), and grown in appropriate medium supplemented with 10% fetal bovine serum and 1% penicillin/streptomycin and maintained at 37°C in a humidified incubator at 5% CO2. “RAS-less” mouse embryonic fibroblast (MEF) cell lines were obtained from the NIH (NCI RAS initiative at the FNLCR). The Sanglifehrin A-competitive CYPA inhibitor previously described as compound 31, was synthesized at WuXi AppTec (Chengdu, China).

**Effect of gene mutation status on *KRAS* dependence**

To investigate the relationship between cell line gene mutation status and *KRAS* dependence, we trained a Random Forest regression model to predict KRAS Chronos effect score as a function of gene mutation status. The input features were an N x M matrix, where N is the number of cell lines and M is the number of genes that were mutated in at least 10% of the cell lines (N=1071, M=782). Each column is a binary representation of a gene’s mutation status for each cell line (1 if mutated, 0 if not). The target variable is a length-N 1-D vector of the effect scores. The model was built using the scikit-learn library in Python. The model consisted of 50 trees, and for each tree, 1/3 of the total number of features were considered at each split point.

The top 5 features with the largest feature importance values in the trained random forest model were then tested for statistical significance. This was done by constructing 100 additional Random Forest regression models with randomly permuted effect scores and defining five null distributions consisting of the Nth largest feature importance value of each model across all 100 models, from N=1 to 5. A right-tailed hypothesis test was then performed for each feature with a Bonferroni-adjusted significance cutoff of p < 0.05 / 5 = 0.01. The top feature was compared to the N=1 distribution, the second feature was compared to the N=2 distribution, etc.

Identical analyses to the above were performed to investigate the relationship between gene mutation status and *NRAS* and *HRAS* dependence.

**Protein production**

His6-TEV-KRAS4BWT[residues 1-169], His6-TEV-KRAS4BG12A[residues 1-169],His6-TEV-KRAS4BG12C[residues 1-169],His6-TEV-KRAS4BG12D[residues 1-169],His6-TEV-KRAS4BG12R[residues 1-169],His6-TEV-KRAS4BG12S[residues 1-169],His6-TEV-KRAS4BG12V[residues 1-169],His6-TEV-HRASWT[residues 1-166],His6-TEV-NRASWT[residues 1-172]His6-TEV-AviTag-KRAS4BG12C[residues 1-169], His6-TEV-CYPA[full-length], His6-TEV-AviTag-CYPA[full-length], and GST-TEV-BRAF[residues 155-229] were expressed from a pET28 vector in BL21(DE3) *E. coli* and purified as described previously2. The following were also performed as previously described2: cleavage of the His6 tag and subsequent purification of the RAS and CYPA proteins for crystallography; cleavage of the His6 tag, biotinylation of the Avi-tag, and purification of the avi-tagged RAS and CYPA proteins; purification of GST_TEV-BRAF; and nucleotide exchange to guanosine-5'-[(β-γ)-imido]triphosphate (GMPPNP) for RAS proteins.

**Tri-complex Crystallization**

Purified human CYPA and RAS(untagged WT and mutants) bound to GMPPNP were combined in a 2:1 CYPA:RAS molar ratio in a buffer solution consisting of 12.5 mM HEPES-NaOH pH 7.3, 75 mM NaCl, 5 mM MgCl2. RMC-7977 was added from a 10 mM DMSO stock to give solutions of 100 µM RAS, 200 µM CYPA, and 300 µM RMC-7977 in 1 mL total volume. These mixtures were incubated for 5 minutes on ice and the Tri-complexes were purified via gel filtration using a Superdex 75 10/300 GL column pre-equilibrated with a buffer consisting of 12.5 mM HEPES-NaOH pH 7.3, 75 mM NaCl, 5 mM MgCl2. Fractions containing the Tri-complex were pooled and concentrated to 15 mg/mL using an Amicon Ultra-4 30K centrifugal filter (Millipore Sigma). 80 µL of a screen composed of 0.1 TRIS pH 8.0 and 20-30% PEG 4000 (increasing by 0.833% increments was dispensed into the wells of an MRC 2 crystallization plate. 0.3 µL of well solution was mixed with 0.3 µL of the concentrated tri-complex in a sitting drop and the plate was incubated at 18°C. Crystals grew overnight and were vitrified following cryoprotection via mother liquor supplemented with 12.5% glycerol.

**Crystallography data collection and refinement**

KRASWT, KRASG12C, KRASG12D, KRASG12V tri-complex X-ray diffraction datasets were collected at the Stanford Synchrotron Radiation Lightsource (SSRL 9-2, Menlo Park, California, USA). KRASG12A and KRASG12S tri-complex X-ray diffraction datasets were collected at the National Synchrotron Light Source II (NSLS2 17-ID-2 (FMX), Upton, New York, USA). KRASG12R, HRASWT, and NRASWT tri-complex X-ray diffraction datasets were collected at the Canadian Light Source (CLS CMCF-08ID, Saskatoon, Saskatchewan, Canada). All datasets were collected at 100K. All Data were processed with XDS, and initial structures were determined via Phaser using previously solved KRAS and CYPA as molecular replacement search models3,4. Ligand restraints were generated using AceDRG5. The final structures were determined through iterative rounds of model building using Coot and refinement using REFMAC5 from the CCP4 suite and phenix.refine6-8. Final processing and refinement statistics can be found in Supplementary Table 1.

**RAS-RAF and RAS-CYPA TR-FRET**

TR-FRET was used as previously described to assess disruption of the interactions between wild-type RAS or the mutant oncogenic RAS proteins, and to assess the induction of interactions between the RAS proteins and CYPA2.

**CYPA binding affinity (KD1)**

The binding affinity of compounds for CYPA was assessed by surface plasmon resonance (SPR) on Biacore 8K instrument as previously described2.

**RAS binding affinity (KD2)**

The binding affinity of compound-bound CYPA for the mutant oncogenic RAS proteins mentioned was assessed by surface plasmon resonance (SPR) on Biacore 8K instrument. AviTag-RAS[1-169] was immobilized on a streptavidin sensor chip, and varying compound concentrations were flowed over the chip in assay buffer (10 mM HEPES-NaOH pH 7.4, 150 mM NaCl, 0.005% v/v Surfactant P20, 2% v/v DMSO, 25uM CYPA). The SPR sensorgrams were fit using either a steady state affinity model or a 1:1 binding (kinetic) model to assess the *KD* for RAS binding.

**AlphaLISA and MesoScale Discovery (MSD) analysis of cellular ERK phosphorylation**

Cells were seeded at 5,000-15,000 and 15,000-30,000 cells per well in tissue culture-treated 384- and 96-well plates, respectively, and incubated overnight. 0.1-1 µg/mL aqueous doxycycline hyclate was added to growth media at the time of seeding for doxycycline-inducible cell lines. The following day, cells were exposed to serial dilutions of compound or DMSO control (0.1% v/v) for specified timepoints using a Labcyte Echo 550 or Tecan D300e digital dispenser. Following incubation, cells were lysed and the levels of ERK phosphorylation determined using the AlphaLISA SureFire Ultra pERK1/2 (T202/Y204) Assay kit (Perkin Elmer ALSU-PERK-A50K) or MSD Multi-Array Assay Systems for Phospho/Total ERK1/2 Whole Cell Lysate Kit (K15107D), following the manufacturers’ protocols. Signal was detected using a Perkin Elmer Envision with standard AlphaLISA settings, or a Meso QuickPlex SQ120 reader for MSD. For AlphaLISA, raw signal was normalized to vehicle control and a low signal control compound ((sample signal – avg low control)/(avg vehicle – avg low control)*100). MSD signal from pERK1/2 was divided by MSD signal for total ERK1/2. The ratio was normalized to vehicle (% of pERK/total ERK= ((ratio pERKtreated/total ERKtreated)/ (ratio pERKDMSO/total ERKDMSO))*100). For both assays, data were plotted as a function of log M [compound] with a sigmoidal concentration response (variable slope) model fitted to the data to estimate the inhibitor half-maximum effective concentration (EC50) in Prism 9 (GraphPad).

**Cell proliferation analysis**

For 2D cell proliferation assays, cells were seeded in tissue-culture treated 384- or 96-well plates and incubated overnight. For 3D proliferation assays, cells were seeded in round-bottom ultra-low attachment 96-well plates, centrifuged at 1000 rpm for 10 minutes to pellet the cells, and incubated overnight or up to 72 hours to allow for spheroid formation. 0.1-1 µg/mL aqueous doxycycline hyclate was added to growth media at the time of seeding for doxycycline-inducible cell lines. Cells were exposed to serial dilutions of compound or DMSO control (0.1% v/v) using a Labcyte Echo 550 or Tecan D300e digital dispenser and incubated for 120 hours at 37°C. Doxycycline-inducible cell lines were re-treated with doxycycline at the time of compound treatment. Cell viability was determined by CellTiter-Glo® 2.0 reagent (Promega, G9243) or 3D CellTiter-Glo® reagent (Promega, G9683) according to the manufacturers’ protocols. Luminescence was detected using a SpectraMax M5 Plate Reader (Molecular Devices) of Perkin Elmer Enspire. Luminescence signal was normalized to vehicle-treated wells (% vehicle = (lumtreated/mean(lumvehicle))*100). For PSN1 and HUPT3, raw signal was normalized to vehicle control and a low signal control compound ((sample signal – avg low control)/(avg vehicle – avg low control)*100). For NCI-H441 and AsPC-1 cells treated with the combination of RMC-7977 and the Sanglifehrin A-competitive CYPA inhibitor (3 mM), luminescence signal was normalized to that of the CYPA inhibitor treatment-only control (% CYPA inhibitor = (lumtreated/mean(lumCYPA inhibitor)*100) . Data were plotted as a function of log molar [inhibitor] and a 4-parameter sigmoidal concentration response model was fitted to the data to calculate the EC50. Data were fit with top plateau constrained to 100% and lower plateau constrained depending on the cell line (CAPAN1, ASPC1, and Hs766T 25% ≥ LP ≥ 0%; HCT116, SKMEL30, and KU1919 10% ≥ LP ≥ 0%; NCIH358, A375 PSN1 and HUPT3 LP = 0%).

**Cellular RAS-RAF and RAS-CypA Assays**

U2OS cells or U2OS cells with a knocked out *PPIA* gene (encoding CYPA) were seeded at 500,000 cells per well in a 6-well plate and incubated overnight. KRAS4B containing the indicated mutations had been cloned into the pNLF-N plasmid. Full-length CYPA was cloned into the pHTN plasmid, and the RBD of RAF1 (residues 51-149) were cloned into the pHTC plasmid. U2OS cells were transfected using FuGene HD reagent with the pNLF-KRAS and the pHTC-RAF1 plasmids, and U2OS PPIA KO cells were transfected using FuGene HD reagent with the pNLF-KRAS and the pHTN-CYPA plasmids. The following day, the cells were trypsinized and reseeded in the wells of a white tissue culture treated 96-well plate in OptiMem phenol red-free media (Gibco) containing 4% FBS and a 1:1000 dilution of NanoBRET 618 HaloTag ligand (Promega). For the endpoint dose-response curves, vivazine nanoluciferase substrate was added to 1x concentration in OptiMem phenol red-free media with 4% FBS. Varying concentrations of RMC-7977 were added and incubated for 1 hour before the nanoBRET signal was measured on a PerkinElmer Envision plate reader. For the kinetic assays, endurazine nanoluciferase substrate was used in place of vivazine, and the plate was placed in a Cytation5 multi-mode reader pre-equilibrated to 37°C and 5% CO2. After approximately one-hour of equilibration, RMC-7977 (50 nM) was added and the nanoBRET signal was measured.

**Generation of NCI-H358 expressing low and high CYPA**

NCI-H358 cells were transduced by lentivirus encoding Cas9, a guide RNA targeting the PPIA (CYPA) gene, and the puromycin resistance gene. Following puromycin selection, FLAG-CYPA was reintroduced under the control of a tet-inducible promoter by lentiviral transduction. Clones were isolated, and clones with high and low expression levels of FLAG-CYPA were identified. Expression of the transgene was induced by adding 0.1 µg/mL of doxycycline for 24 hours.

**Generation of “Ras-less” mouse embryonic fibroblast (MEF) cells with inducible LOH**

KRasloxKRASG12C cells were generated as previously described9. Briefly, KRASG12C retroviral plasmid was created by point mutagenesis from pBABE HA-tagged KRASWT plasmid (provided by Channing Der, Addgene plasmid # 75282). KRASWT/G12C-expressing retroviruses were generated by co-transfection of pBABE plasmids together with pAmpho plasmid into 293T cells using FuGENE HD Transfection Reagent (Promega). The retroviruses were transduced into Kraslox/lox MEFs followed by 2 weeks of puromycin selection (1 μg/mL) in complete DMEM medium. To obtain Kras null-KRASWT/G12C clones, cells were then cultured in the presence of 4-hydroxytamoxifen (4OHT) (Sigma, 600 nM) for another 2 weeks in order to achieve complete deletion of endogenous Kras alleles.

**Generation of cell lines with acquired resistance to adagrasib**

NCI-H358 cells resistant to adagrasib were generated by continuously culturing in growth media containing 1 µM adagrasib for approximately 2 months. Resistant cells were subsequently maintained in culture media containing 1 µM adagrasib, which was removed during assays.

**Generation of inducible full-length and fusion RTK overexpression cell lines**

Plasmids encoding the tet-controlled transcriptional silence (tTS) and reverse tet-controlled transcriptional activator (rtTA) and tet-inducible receptor tyrosine kinases (RTKs) and fusion RTKs were synthesized and packaged into lentivirus at Vector Builder. All lentivirus transductions were performed with addition of polybrene (4 µg/ml). NCI-H358 and MiaPaCa2 cells were transduced with lentivirus encoding tTS/rtTA for 48 hours prior to selection with blasticidin (5 µg/ml) for 12 days. The concentration of blasticidin was lowered to 2 µg/ml for maintenance cell culture. NCI-H358 tTS/rtTA cells were subsequently transduced with lentivirus encoding tet-inducible GFP or RTKs (EGFR, EGFRA289V, HER2, FGFR2, RET M918T). MiaPaCa2 tTS/rtTA cells were transduced with lentivirus encoding GFP or tet-inducible RTK fusions (EML4-ALK, FGFR3-TACC3, CCDC6-RET). The resulting cells with tet-inducible expression of RTKs or RTK fusions were cultured in growth media containing puromycin (2 µg/ml) and blasticidin (2 µg/ml) starting 48 hours after transduction to maintain selective pressure for both plasmids.

**PRISM assay**

*Cell Lines*

The PRISM cell set consisted of 931 cell lines representing more than 45 lineages, which largely overlapped with the Cancer Cell Line Encyclopedia (CCLE) cell lines (<https://portals.broadinstitute.org/ccle>). Cell lines were grown in RPMI without phenol red + 10% FBS for adherent lines and RPMI without phenol red + 20% FBS for suspension lines. Parental cell lines were stably infected with a unique 24-nucleotide DNA barcode via lentiviral transduction and blasticidin selection. After selection, barcoded cell lines were expanded and subjected to quality control (mycoplasma contamination test, a SNP test for confirming cell line identity, and barcode ID confirmation). Passing barcoded lines were then pooled (20-25 cell lines per pool) based on doubling time similarity and frozen in assay-ready vials.

*PRISM Screening*

Test compounds were added to 384-well plates at 8-point concentration with 3-fold dilutions in triplicate. These assay-ready plates were then seeded with the thawed cell line pools. Adherent cell pools were plated at 1250 cells per well, while suspension and mixed adherent/suspension pools were plated at 2000 cells per well. Treated cells were incubated for 5 days then lysed. Lysate plates were collapsed together prior to barcode amplification and detection.

*Barcode Amplification and Detection*

Each cell line’s unique barcode is located in the 3’UTR of the blasticidin resistance gene and therefore is expressed as mRNA. Total mRNA was captured using magnetic particles that recognize polyA sequences. Captured mRNA was reverse-transcribed into cDNA and then the sequence containing the unique PRISM barcode was amplified using PCR. Finally, Luminex beads that recognize the specific barcode sequences in the cell set were hybridized to the PCR products and detected using a Luminex scanner which reports signal as a median fluorescent intensity (MFI).

*Data Processing*

1. Each detection well contained 10 control barcodes in increasing abundances as spike-in controls. For each plate, we first create a reference profile by calculating the median of the log2(MFI) values across negative control wells for each of these spiked-in barcodes.
2. For each well, a monotonic smooth p-spline was fit to map the spike in control levels to the reference profile. Next, we transform the log2(MFI) for each cell barcode using the fitted spline to allow well-to-well comparisons by correcting for amplification and detection artifacts.
3. Next, the separability between negative and positive control treatments was assessed. In particular, we calculated the error rate of the optimum simple threshold classifier between the control samples for each cell line and plate combination. Error rate is a measure of overlap of the two control sets and was defined as Error = (FP + FN)/n, where FP is false positives, FN is false negatives, and n is the total number of controls. A threshold was set between the distributions of positive and negative control log2(MFI) values (with everything below the threshold said to be positive and above said to be negative) such that this value is minimized. Additionally, we also calculated the dynamic range of each cell line. Dynamic range was defined as DR=μ- - μ+, where μ+/− stood for the median of the normalized logMFI values in positive/negative control samples.
4. We filtered out cell lines with error rate above 0.05 or a dynamic range less than 1.74 from the downstream analysis. Additionally, any cell line that had less than 2 passing replicates was also omitted for the sake of reproducibility. Finally, we computed viability by normalizing with respect to the median negative control for each plate. Log-fold-change viabilities were computed as log-viability = log2(x) – log2(μ−), where log2(x) is the corrected log2(MFI) value in the treatment and log2(μ−) is the median corrected log2(MFI) in the negative control wells in the same plate.
5. Log-viability scores were corrected for batch effects coming from pools and culture conditions using the ComBat algorithm10.
6. We fit a robust four-parameter logistic curve to the response of each cell line to the compound: f(x) = b + (a – b)/(1 + es log(x/EC50))

With the following restrictions:

1. We require that the upper asymptote of the curve be between 0.99 and 1.01
2. We require that the lower asymptote of the curve be between 0 and 1.01
3. We do not enforce decreasing curves
4. We initialize the curve fitting algorithm to guess an upper asymptote of 1 and a lower asymptote of 0.5
5. When the standard curve fit fails, we report the robust fits provided by the dr4pl R-package

and computed AUC values for each dose-response curve and IC50 values for curves that dropped below 50% viability.

1. Finally, the replicates were collapsed to a treatment-level profile by computing the median log-viability score for each cell line.

*Associations between inhibitor sensitivity Area Under the Curve (AUC) and mutations*

Of the 931 cell lines assayed, AUC values were successfully derived for 818 cell lines by fitting a robust four-parameter logistic curve to the response of each cell line to the compound. For every gene with non-silent mutations in at least four cell-lines, we compared the AUC values between cells with and without those mutations using a t-test. This analysis was carried out for: (i) the full dataset; (ii) excluding cell lines with non-silent KRAS mutations; and (iii) excluding cell lines that have either KRAS or NRAS non-silent mutations.

*Bioinformatics analyses*

Gene mutation and gene expression data were downloaded from the 22Q4 release of the DepMap Data Portal11. All qc-filtered compound AUC values were cross-referenced with DepMap data using an exact matching of the cell line name. For tumor models with no publicly available data, we carried out whole exome sequencing to ascertain gene mutations and RNA sequencing to ascertain gene expression. DNA mutation calling was accomplished with TNSeq using the hg38 version of the human genome12. Functional annotation of the resulting mutation calls was accomplished with Variant Effect Predictor and further annotated with oncoKB13. Gene expression was quantified using salmon against the hg38 version of human transcriptome further processed using txImport and edgeR to generate normalized counts14-16.

See Supplementary Table 2 for PRISM panel AUC values.

**Cell panel**

A panel of 183 cancer cell lines harboring mutant and wild-type RAS was selected for screening at Crown Bioscience (Supplementary Table 3). The panel consisted of cell lines with any substitution at position 12 of KRAS (KRASG12X); cell lines with substitutions in KRAS at any position other than 12, 13, and 61 (KRASother/VUS); cell lines with other oncogenic mutations in the RAS pathway (ABL1, ALK, ARAF, BRAF, CBL, EGFR, ERBB2, ERBB3, ERBB4, ERRFI1, FGFR1, FGFR2, FGFR3, FGFR4, FLT3, HRAS, IGF1R, JAK2, KIT, MAP2K1, MAP2K2, MAPK1, MET, NF1, NRAS, NTRK1, NTRK2, NTRK3, PDGFRA, PTPN11, RAC1, RAF1, RASA1, RET, RIT1, ROS1, SOS1); and cell lines with no oncogenic mutations in the RAS pathway. To measure inhibition of cell proliferation/viability, cells were cultured in methylcellulose and treated in triplicate with nine concentrations of RMC-7977 (top concentration of 1 µM, three-fold serial dilutions) or DMSO dispensed by a Tecan D300e digital dispenser. Cells were incubated for 120 hours prior to measurement of adenosine triphosphate (ATP) levels using the CellTiter-Glo® Luminescent Cell Viability Assay (CTG) (Promega, G7572), a method of determining the number of metabolically active cells based on quantitation of cellular ATP, according to the manufacturer’s instructions. CTG assay readouts were plotted as a function of log molar [inhibitor] and a 4-parameter sigmoidal concentration response model was fitted to the data to estimate the inhibitor EC50 using Genedata Screener.

**Western blot analysis**

Cells were seeded at 200,000 to 4 million cells per well of tissue culture-treated 6-well plates or 100 mm dishes in growth medium alone or with the addition of 0.1-1 µg/mL aqueous doxycycline hyclate for doxycycline-inducible cell lines. After overnight incubation, compounds or DMSO (0.1% v/v) were added and incubated for the indicated time points. Cells were washed twice with ice-cold PBS and lysed with NP-40 lysis buffer (Thermo Fisher Scientific, J60766); MSD Tris Lysis Buffer (MSD, R60TX-2); or a lysis buffer containing 1% Triton X-100, 20 mM Tris-HCl, 150 mM NaCl, and 1 mM EDTA. All lysis buffers were supplemented with protease and phosphatase inhibitors. Lysates were scraped and collected before centrifugation at 21,000 x g for 10 minutes at 4°C. The protein-containing supernatants were quantified by BCA assay (Pierce, 23225) and equal quantities of protein were denatured with LDS and reducing agent at 95°C. Samples were resolved on 12% or 4-12% Bis-Tris polyacrylamide gels, then transferred to a nitrocellulose membrane using the iBlot 2.0 system or wet transfer. Membranes were blocked in Intercept TBS buffer (LiCor, 927-60001) or 3% milk before probing with primary antibodies overnight at 4°C. Goat anti-rabbit IR800-conjugated secondary (LiCor, 926-32211), goat anti-mouse IR800-conjugated secondary (LiCor, 926-32210), goat anti-mouse IR680-conjugated (LiCor, 926-68070), or goat anti-rabbit IR680-conjugated ( LiCor, 926-68071) secondary antibodies were added as appropriate, and the membranes were imaged on a LiCor Odyssey imager. Alternatively, membranes were incubated with HRP-linked anti-rabbit (7074, Cell Signaling Technology) or anti-mouse (7076) secondary antibodies and developed with Clarity or ClarityMax chemiluminescent substrates using a ChemiDoc XRS+ imager (Bio-Rad).

The following primary antibodies were used at 1:1,000 dilution: anti-phospho-p44/42 MAPK (ERK1/2) T202/Y204 (no. 9101, no. 4370), anti-p44/42 (ERK1/2) (no. 9107, no. 9102), anti-phospho-MEK1/2 S217/221 (no. 9121), anti-MEK1/2 (no. 4694), anti-phospho-p90RSK S380 (no. 12032), anti-RSK1/RSK2/RSK3 (no. 14813), anti-phospho-CRAF S338 (no. 9427), anti-CRAF (no. 12552), anti-RAS (no. 8832), anti-BIM (no. 2933), anti-HSP90 (no. 4877), anti-PARP (no. 9532), anti-β-Actin (no. 3700), anti-vinculin (no. 13901) all from Cell Signaling Technology; anti-RAS (no. ab108602) from Abcam; and anti-vinculin (no. V9131) from Millipore Sigma.

**Quantification of CYPA protein level in cell and tumor samples**

Cells were seeded at a density of 1 million cells in triplicate wells of 6-well plates and incubated overnight. The following day, cells were collected by Trypsin, washed once in PBS, pelleted by microcentrifugation, and snap frozen in a slurry of dry ice and ethanol. Tumor samples were collected and flash frozen (see “NCI-H441 xenograft studies” for xenograft tumor growth methods). All samples were transferred to IQ Proteomics (Cambridge, MA) for further analysis. The samples were lysed by bead beating in 8M urea + 200 mM EPPS pH 8.0 + HALT protease inhibitor cocktail. Following bead beating, SDS was added to the lysate, 1% final (w/v). The protein concentration in each lysate was measured using the BCA assay, and lysate corresponding to 16 ug of total protein was aliquoted for downstream processing. Samples were reduced and alkylated via DTT/Iodoacetamide, and protein was isolated via ethanol precipitation. Protein was digested in 100mM EPPS pH 8.1, using LysC (overnight, room temperature) and Trypsin (6 hours, 37°C). 5 stable isotope labeled standard peptides spanning the CYPA protein sequence (sequences VSFELFADK, ALSTGEK, FEDENFILK, TEWLDGK, EGMNIVEAMER) were spiked into each sample at a ratio of 25 femtomoles per microgram of total protein digested. Endogenous (light) and internal standard (heavy) peptides were quantified via custom targeted assay on an Orbitrap Lumos instrument (Thermo).

**Bioanalysis of cells and supernatant**

10 million cells were exposed to RMC-7977 (10, 100, 1000 nM) in suspension at 1 million cells/ml for 1 hr at 37°C. Cells were then pelleted by centrifugation, and 1 ml of media supernatant was transferred to a microcentrifuge tube and stored at -80°C. Cell pellets were washed twice in cold PBS. After aspirating the final PBS wash, pre-weighed tubes containing the cell pellets were weighed prior to snap freezing in a slurry of dry ice and ethanol. Concentrations of RMC-7977 in cell pellets and supernatant were determined using liquid chromatography-tandem mass spectrometry (LC-MS/MS) methods. Cell pellet samples were resuspended in cell media (diluted as needed) then treated as supernatant. An aliquot of supernatant or resuspended cells (50 µL) was quenched with a 3X volume of acetonitrile containing internal standard (IS) terfenadine (2.5 ng/mL). Samples were vortexed, centrifuged, and analyzed on a Sciex 6500+ triple quadrupole mass spectrometer equipped with a Shimadzu AD LC system. A Waters ACQUITY UPLC BEH C4 1.7µm (2.1 × 50 mm) column was used with gradient elution for compound separation. RMC-7977 and IS were detected by positive electrospray ionization (ESI) using multiple reaction monitoring (MRM) (RMC-7977: m/z 865.273/833.500; terfenadine: m/z 471.939/436.300). The lower limit of quantification was 0.25 ng/mL, and the calibration range was 0.25 to 400 ng/mL. The intracellular concentration of RMC-7977 was calculated using the mass of each cell pellet (mass of empty tube subtracted) and the known cell number, with the assumptions that the volume of a cell is ~2000 µm3, that the density of a cell is approximately the density of water (thus, cell volume = cell mass); and that any compound in CYPA KO cells in excess of the media concentration is likely membrane bound. The ratio of compound concentration in the cell pellet to compound in media was determined for each concentration of RMC-7977 tested.

***In vivo* xenograft studies**

*Animal studies*

Studies were conducted at the following CROs: GenenDesign (Shanghai, China), Pharmaron (Beijing, China), Wuxi AppTec (SuZhou, China). All CDX/PDX mouse studies and procedures related to animal handling, care and treatment were conducted in compliance with all applicable regulations and guidelines of the relevant Institutional Animal Care and Use Committee (IACUC). Female BALB/c nude mice and NOD SCID mice 6-8 weeks old from Beijing Vital River/VR Laboratory Animal Co., LTD, Beijing AniKeeper Biotech Co., Ltd. and Shanghai Sino-British SIPPR/BK Laboratory Animal Co., LTD were used for these studies.

*Generation of xenograft models*

In order to generate subcutaneous xenograft tumors each mouse was inoculated at the right flank with tumor cells (2 x 106 - 1 x 107) in 100-200 uL of media/PBS supplemented with Matrigel (1:1). Treatments were started when the average tumor size reached 150-250 mm3. Tumor size was measured at two dimensions using a digital caliper, and the tumor volume in mm3 was calculated using the formula: Volume = ((width)2 × length)/2. Mice on studies were weighed and tumor measurements were collected 2 times a week.

The human primary cancer xenograft models were generated using fresh cancer tumor fragments obtained from hospitals with informed consent from the patients in accordance with protocols approved by the Hospital Institutional Ethical Committee (IEC). The tumor fragments were serial-passaged in BABL/c nude mice and then cryopreserved. The cryopreserved tumors were recovered by implantation in BALB/c nude mice and further serial passaged and frozen for study implantation use. Recovered tumor fragments of about 15-30 mm3 in size from each model were implanted (s.c.) into right flanks of Balb/c nude mice. Treatment started when average tumor volume reached 150-250mm3.

*RMC-7977 treatment*

Tumor-bearing animals were randomized and assigned into groups (n=3-10/group). RMC-7977 was administered via oral gavage daily at 10 mg/kg, using the formulation made of 10/20/10/60 (%v/v/v/v) DMSO/PEG 400/Solutol HS15/water， and the vehicle formulation was used for control group. Animals were treated for 28 days (or up to 110 for selected models) or an earlier time if tumor burden reached humane endpoint. Mean ± s.e.m was plotted in the waterfall plots and box plots. Body weights were collected twice a week during the study. **For single-dose PK/PD study**, mice were randomized into treatment groups when mean tumor volume reached 400-600 mm3. At the indicated time points after a single dose of RMC-7977 at the indicated dose levels, blood and tumor samples were collected for PK and PD analysis, respectively.

**Sotorasib resistance xenograft studies**

Studies were conducted on 6-week-old female NSG mice purchased from Charles River. Tumor cells derived from a NSCLC patient who relapsed on treatment with sotorasib were injected sub-cutaneously in the flanks of the abdomen (2x106 cells in 100µl of PBS) and formed palpable and measurable tumors after approximately 2 weeks. Tumor volume was monitored every other day using caliper, and the tumor volume in mm3 was calculated using the formula: Volume = ((width)2 × length)/2, where width and length are measured in mm. Compounds were administered by oral gavage and prepared as follows: sotorasib (50 mg/kg) was formulated in 2% (w/v) HPMC (Hydroxypropyl-methyl cellulose - Sigma H8384/ (v/v) 1% Tween 80; RMC-7977 (10 mg/kg) was formulated in 10% (v/v) DMSO/20% (v/v) PEG400/10% (v/v) Solutol (Merck Kolliphor® HS 15, 42966) /60% (v/v) water according to manufacturer instructions.

All procedures and animal housing conformed to the regulatory standards and were approved by the Italian Health Minister (authorization n° 1227/2020-PR). All experiments were performed in accordance with the guideline for Ethical Conduct in the Care and Use of Animals as stated in The International Guiding Principles for Biomedical Research Involving Animals, developed by the Council for International Organizations of Medical Sciences.

**Mouse blood and tumor sample bioanalysis**

Whole blood and tumor concentrations of RMC-7977 were determined using liquid chromatography-tandem mass spectrometry (LC-MS/MS) methods performed at WuXi AppTec (Suzhou, China). Tumor tissue samples were homogenized with a 10× volume of methanol/15mM PBS (1:2; v:v). An aliquot of whole blood or homogenized tissue (20 µL) was transferred to 96-well plates (or tubes) and quenched with a 20× volume of acetonitrile/methanol (1:1; v/v) with 0.1% formic acid containing a cocktail of internal standards (IS, 100 ng/mL each of labetalol, tolbutamide, verapamil, dexamethasone, glyburide and celecoxib). After thorough mixing and centrifugation, the supernatant was directly analyzed on a Sciex 6500+ triple quadrupole mass spectrometer equipped with an ACQUITY UPLC system. An ACQUITY UPLC BEH C18 1.7 μm (2.1 × 50 mm) column was used with gradient elution for compound separation. RMC-7977 and IS verapamil were detected by positive electrospray ionization using multiple reaction monitoring (RMC-7977: m/z 865.4/706.4; verapamil: m/z 455.2/164.9). The lower limit of quantification was 2.0 ng/mL, and the calibration range was 2.0 to 3000 ng/mL.

***In vivo* pharmacodynamic analysis by *DUSP6* qPCR**

RNA extraction and analysis of *DUSP6* levels by in tumor tissue were performed as previously described2.

**Extended References**

1 Mackman, R. L. *et al.* Discovery of a Potent and Orally Bioavailable Cyclophilin Inhibitor Derived from the Sanglifehrin Macrocycle. *J Med Chem* **61**, 9473-9499 (2018). https://doi.org:10.1021/acs.jmedchem.8b00802

2 Schulze, C. J. S., K. J.; Zhao, Y; Yang, Y. C.; Cregg, J; Kim, D.; et al. Chemical remodeling of a cellular chaperone to target the active state of mutant KRAS. *Science* (2023). https://doi.org:doi.org/10.1101/115717

3 Kabsch, W. Xds. *Acta Crystallogr D Biol Crystallogr* **66**, 125-132 (2010). https://doi.org:10.1107/S0907444909047337

4 McCoy, A. J. *et al.* Phaser crystallographic software. *J Appl Crystallogr* **40**, 658-674 (2007). https://doi.org:10.1107/S0021889807021206

5 Long, F. *et al.* AceDRG: a stereochemical description generator for ligands. *Acta Crystallogr D Struct Biol* **73**, 112-122 (2017). https://doi.org:10.1107/S2059798317000067

6 Emsley, P. & Cowtan, K. Coot: model-building tools for molecular graphics. *Acta Crystallogr D Biol Crystallogr* **60**, 2126-2132 (2004). https://doi.org:10.1107/S0907444904019158

7 Murshudov, G. N. *et al.* REFMAC5 for the refinement of macromolecular crystal structures. *Acta Crystallogr D Biol Crystallogr* **67**, 355-367 (2011). https://doi.org:10.1107/S0907444911001314

8 Liebschner, D. *et al.* Macromolecular structure determination using X-rays, neutrons and electrons: recent developments in Phenix. *Acta Crystallogr D Struct Biol* **75**, 861-877 (2019). https://doi.org:10.1107/S2059798319011471

9 Ambrogio, C. *et al.* KRAS Dimerization Impacts MEK Inhibitor Sensitivity and Oncogenic Activity of Mutant KRAS. *Cell* **172**, 857-868 e815 (2018). https://doi.org:10.1016/j.cell.2017.12.020

10 Johnson, W. E., Li, C. & Rabinovic, A. Adjusting batch effects in microarray expression data using empirical Bayes methods. *Biostatistics* **8**, 118-127 (2007). https://doi.org:10.1093/biostatistics/kxj037

11 Ghandi, M. *et al.* Next-generation characterization of the Cancer Cell Line Encyclopedia. *Nature* **569**, 503-508 (2019). https://doi.org:10.1038/s41586-019-1186-3

12 Freed, D. A., R.; Weber, J. A.; Edwards, J. S. The Sentieon Genomics Tools - A fast and accurate solution to variant calling from next-generation sequence data. *bioRxiv* (2017).

13 Chakravarty, D. *et al.* OncoKB: A Precision Oncology Knowledge Base. *JCO Precis Oncol* **2017** (2017). https://doi.org:10.1200/PO.17.00011

14 Patro, R., Duggal, G., Love, M. I., Irizarry, R. A. & Kingsford, C. Salmon provides fast and bias-aware quantification of transcript expression. *Nat Methods* **14**, 417-419 (2017). https://doi.org:10.1038/nmeth.4197

15 Robinson, M. D., McCarthy, D. J. & Smyth, G. K. edgeR: a Bioconductor package for differential expression analysis of digital gene expression data. *Bioinformatics* **26**, 139-140 (2010). https://doi.org:10.1093/bioinformatics/btp616

16 Soneson, C., Love, M. I. & Robinson, M. D. Differential analyses for RNA-seq: transcript-level estimates improve gene-level inferences. *F1000Res* **4**, 1521 (2015). https://doi.org:10.12688/f1000research.7563.2
