# Supplementary material for: Concurrent inhibition of oncogenic and wild-type RAS-GTP for cancer therapy
Source: Research Square preprint supplement (doi:10.21203/rs.3.rs-3122478/v1), 2023-07-07
Supplement: Supplementary file 3 [file 8cd5180d387f29fe7203bdd5.xlsx]

## Sheet: Sheet1
Cell line	Mutation	RMC-7977 EC50
NCIH2009	KRAS G12A	5.7544e-09
SW1116	KRAS G12A	1.8197e-08
CALU1	KRAS G12C	6.60693e-10
HCC44	KRAS G12C	5.24807e-09
KYSE410	KRAS G12C	4.0738e-09
MIAPACA2	KRAS G12C	4.2658e-09
NCIH1373	KRAS G12C	1.77828e-09
NCIH1792	KRAS G12C	1.90546e-09
NCIH2122	KRAS G12C	9.33254e-10
NCIH23	KRAS G12C	8.51138e-10
NCIH358	KRAS G12C	6.30957e-10
SW1463	KRAS G12C	7.58578e-09
SW1573	KRAS G12C	1e-06
SW756	KRAS G12C	1.1749e-08
SW837	KRAS G12C	1.69824e-09
UMUC3	KRAS G12C	4.16869e-10
A427	KRAS G12D	4.7863e-09
AGS	KRAS G12D	1.14815e-09
ASPC1	KRAS G12D	2.63027e-09
COC1	KRAS G12D	1.58489e-09
HEC1A	KRAS G12D	1.7378e-09
HM7	KRAS G12D	1.86209e-08
HPAC	KRAS G12D	1.09648e-08
HPAFII	KRAS G12D	3.23594e-09
HUCCT1	KRAS G12D	5.12861e-09
LS174T	KRAS G12D	2.23872e-08
LS180	KRAS G12D	1.62181e-08
LS513	KRAS G12D	1.20226e-09
PANC0504	KRAS G12D	1.62181e-09
PANC1	KRAS G12D	1.65959e-09
PANC1005	KRAS G12D	2.34423e-09
PL45	KRAS G12D	3.31131e-08
SKLU1	KRAS G12D	1e-06
SNU1	KRAS G12D	7.76247e-09
SNU601	KRAS G12D	3.0903e-09
SNUC2A	KRAS G12D	2.45471e-09
SU8686	KRAS G12D	2.45471e-09
SW1990	KRAS G12D	1.02329e-09
CAL62	KRAS G12R	2.29087e-09
PSN1	KRAS G12R	3.23594e-09
A549	KRAS G12S	5.12861e-09
LS123	KRAS G12S	1.28825e-09
YCC2	KRAS G12S	2.18776e-09
CAPAN1	KRAS G12V	1.41254e-09
CAPAN2	KRAS G12V	3.31131e-10
CFPAC1	KRAS G12V	2.95121e-09
CORL23	KRAS G12V	2.75423e-09
HUPT4	KRAS G12V	2.51189e-09
LCLC97TM1	KRAS G12V	3.46737e-10
NCIH441	KRAS G12V	3.89045e-10
NCIH727	KRAS G12V	7.24436e-10
NOZ	KRAS G12V	4.16869e-09
OVCAR5	KRAS G12V	1.02329e-09
PANC0327	KRAS G12V	3.38844e-10
RBE	KRAS G12V	3.38844e-10
SHP77	KRAS G12V	1e-06
SKCO1	KRAS G12V	1.04713e-09
SW403	KRAS G12V	1.14815e-09
SW480	KRAS G12V	2.5704e-09
SW620	KRAS G12V	9.54993e-10
SW626	KRAS G12V	1.8197e-09
SW900	KRAS G12V	4.0738e-09
TOV21G	KRAS G13C	1.4125e-08
DLD1	KRAS G13D	4.5709e-08
DV90	KRAS G13D	2.9512e-08
HCT116	KRAS G13D	6.6069e-09
HCT15	KRAS G13D	2.7542e-07
HCT8	KRAS G13D	3.02e-08
LOVO	KRAS G13D	5.6234e-08
NCIH1944	KRAS G13D	3.1623e-08
NCIH747	KRAS G13D	1.8197e-09
T84	KRAS G13D	5.6234e-08
HS766T	KRAS Q61H	1e-06
NCIH1155	KRAS Q61H	1e-06
NCIH460	KRAS Q61H	6.166e-09
CALU6	KRAS Q61K	1.8621e-09
SNU668	KRAS Q61K	4.5709e-09
OZ	KRAS Q61L	3.5481e-09
SW948	KRAS Q61L	1.4454e-08
NCIH716	KRAS R97I	2.7542e-09
LS1034	KRAS A146T	2.5119e-08
KHOSNP	KRAS A59T	1.0233e-09
OVCAR8	KRAS P121H	1e-06
HS852T	NRAS G12V	4.0738e-08
CHP212	NRAS Q61K	1.5849e-09
HT1080	NRAS Q61K	2.3442e-09
NCIH1299	NRAS Q61K	1.7783e-09
NCIH2087	NRAS Q61K	5.8884e-10
SKNAS	NRAS Q61K	1.9055e-09
SKNSH	NRAS Q61K	2.3988e-07
SNU387	NRAS Q61K	5.0119e-09
HEPG2	NRAS Q61L	6.7608e-09
SNU719	NRAS Q61L	6.7608e-09
ASH3	NRAS Q61R	9.7724e-09
SKMEL2	NRAS Q61R	9.1201e-09
SW1271	NRAS Q61R	2.1878e-09
CAL51	NRAS Y137H	2.884e-08
HS578T	HRAS G12D	1.4454e-08
SUM159PT	HRAS G12D	2.4547e-09
T24	HRAS G12V	1.2023e-09
SW48	HRAS G161R	1e-06
SCC9	HRAS L133R	1.2303e-08
RL952	HRAS Q61H	4.5709e-09
NCIH1915	HRAS Q61L	1.6218e-08
HCC2279	EGFR mut	4.5168e-09
HCC2935	EGFR mut	2.389e-09
HCC4006	EGFR mut	2.3878e-09
HCC827	EGFR mut	3.0252e-09
KYSE270	EGFR mut	5.9861e-09
NCIH1650	EGFR mut	4.0444e-08
NCIH1975	EGFR mut	4.0699e-09
NCIH3255	EGFR mut	6.2841e-09
PC9	EGFR mut	1.5571e-08
KYSE150	ERBB3 mut	5.9221e-09
KARPAS299	ALK fusion	9.4694e-08
L82	ALK fusion	1.998e-08
NCIH2228	ALK fusion	1.4122e-08
NCIH3122	ALK fusion	4.6219e-09
SNU2535	ALK fusion	6.4176e-09
SR	ALK fusion	1.4083e-08
SUDHL1	ALK fusion	7.6113e-08
KG1	FGFR fusion	9.1588e-09
RT11284	FGFR fusion	4.8675e-09
RT4	FGFR fusion	1.325e-08
SW780	FGFR fusion	4.999e-09
HCC78	ROS1 fusion	7.4874e-09
JHH2	ROS1 fusion	5.365e-09
U118MG	ROS1 fusion	5.9503e-08
LC2AD	RET fusion	5.1502e-09
KM12L4	NTRK1 fusion	5.1352e-09
FTC133	NF1 LOF	1e-06
HGC27	NF1 LOF	1e-06
LCLC103H	NF1 LOF	3.6693e-07
MEWO	NF1 LOF	4.8551e-09
NCIH1838	NF1 LOF	8.7554e-09
NUGC4	NF1 LOF	3.1623e-09
SKLMS1	NF1 LOF	6.3254e-09
SW684	NF1 LOF	3.6832e-08
TJ905	NF1 LOF	1.0646e-07
U87MG	NF1 LOF	2.8085e-08
HUH28	PTPN11 mut	3.9067e-08
LN229	PTPN11 mut	6.6885e-09
NCIH2110	PTPN11 mut	7.9471e-09
BXPC3	BRAF mut other	2.9665e-08
NCIH1395	BRAF mut other	1e-06
NCIH1666	BRAF mut other	8.2002e-09
NCIH508	BRAF mut other	1.2111e-07
A375	BRAF V600E	1e-06
COLO201	BRAF V600E	1e-06
RKO	BRAF V600E	1e-06
A172	RAS pathway WT	1.1939e-07
AN3CA	RAS pathway WT	2.8704e-08
AU565	RAS pathway WT	1e-06
CHL1	RAS pathway WT	2.6067e-08
DMS114	RAS pathway WT	7.0931e-07
DMS53	RAS pathway WT	7.1529e-08
DU145	RAS pathway WT	1.7234e-08
HCC1187	RAS pathway WT	2.6961e-07
HCC1428	RAS pathway WT	1e-06
HCC1500	RAS pathway WT	5.0149e-08
HCC70	RAS pathway WT	1e-06
HEP3B217	RAS pathway WT	9.3569e-09
JHH7	RAS pathway WT	8.0828e-08
KATOIII	RAS pathway WT	1.4752e-08
MCF7	RAS pathway WT	1e-06
MESSA	RAS pathway WT	1e-06
MFE296	RAS pathway WT	1e-06
MKN1	RAS pathway WT	4.8744e-08
NCIH1581	RAS pathway WT	5.5471e-08
NCIH2172	RAS pathway WT	4.7252e-07
NCIH520	RAS pathway WT	2.8483e-08
SCH	RAS pathway WT	1e-06
SKNFI	RAS pathway WT	3.8242e-08
SKOV3	RAS pathway WT	5.3816e-08
SNU398	RAS pathway WT	1e-06
SW1783	RAS pathway WT	4.5331e-08
TE441T	RAS pathway WT	1e-06
786O	MET amp	1e-06
EBC1	MET amp	1.1259e-09
NCIH1993	MET amp	4.5719e-09
SKBR3	MET amp	1e-06
SNU5	MET amp	3.8619e-09
MKN45	MET amp	8.6384e-09
