# Supplementary material for: Concurrent inhibition of oncogenic and wild-type RAS-GTP for cancer therapy
Source: Research Square preprint supplement (doi:10.21203/rs.3.rs-3122478/v1), 2023-07-07
Supplement: Supplementary file 4 [file 9e3e4a3dcbbe8c1561d241bd.xlsx]

## Sheet: Sheet1
	KRAS G12A	KRAS G12C	KRAS G12D	KRAS G12R	KRAS G12S	KRAS G12V	KRAS WT	HRAS WT	NRAS WT
PDB code	xxxx	xxxx	xxxx	xxxx	xxxx	xxxx	xxxx	xxxx	xxxx
Wavelength (Å)	0.97934	0.97946	0.97741	1.00004	0.97934	0.97946	0.97946
Resolution range (Å)	40.18 - 1.51 (1.564 - 1.51)	35.04 - 1.76 (1.823 - 1.76)	63.53 - 1.88 (1.947 - 1.88)	51.88 - 1.81 (1.875 - 1.81)	35.1 - 1.46 (1.512 - 1.46)	35.39 - 1.57 (1.626 - 1.57)	51.36 - 1.71 (1.771 - 1.71)	64.1 - 1.2 (1.243 - 1.2)	25.86 - 1.59 (1.647 - 1.59)
Space group	P 21 21 21	P 21 21 21	P 21 21 21	P 1 21 1	P 21 21 21	P 21 21 21	P 21 21 21	P 21 21 21	P 21 21 21
Unit cell a, b, c, α, β, γ (Å)	65.85, 84.68, 126.70, 90, 90, 90	65.5 82.94 127.13 90 90 90	65.95, 83.79, 127.06, 90, 90, 90	66.74, 128.90, 87.43, 90, 90.53, 90	65.78, 84.34, 126.63, 90, 90, 90	65.56, 84.09, 127.1, 90, 90, 90	65.47, 82.81, 127.1, 90, 90, 90	65.45, 80.86, 128.21, 90, 90, 90	65.49, 84.27, 126.04, 90, 90, 90
Total reflections	798067 (80768)	453376 (44795)	384633 (35508)	442058 (46012)	879747 (85325)	643364 (65866)	493488 (50326)	1493544 (99150)	696204 (71432)
Unique reflections	111562 (10974)	68061 (6705)	57210 (5573)	131583 (13183)	120857 (11675)	96907 (9507)	75272 (7457)	211362 (20454)	94249 (9290)
Multiplicity	7.2 (7.4)	6.7 (6.7)	6.7 (6.4)	3.4 (3.5)	7.3 (7.3)	6.6 (6.9)	6.6 (6.7)	7.1 (4.8)	7.4 (7.7)
Completeness (%)	99.73 (98.98)	98.06 (97.71)	98.61 (97.51)	95.43 (93.72)	98.38 (96.16)	98.21 (97.67)	99.83 (99.83)	99.55 (97.18)	99.90 (99.91)
Mean I/sigma(I)	8.35 (0.80)	11.08 (0.80)	8.95 (0.98)	7.54 (0.50)	9.99 (0.99)	10.67 (0.93)	12.18 (0.82)	8.22 (0.82)	8.84 (0.77)
Wilson B-factor	20.4	27.03	25.04	28.14	20.12	22.65	28.79	13.4	23.9
R-merge	0.107 (2.504)	0.1133 (2.498)	0.174 (1.867)	0.07867 (2.27)	0.08573 (2.045)	0.1059 (2.779)	0.08702 (2.737)	0.09715 (1.63)	0.1193 (2.356)
R-meas	0.115 (2.693)	0.1229 (2.707)	0.1886 (2.036)	0.09353 (2.688)	0.09236 (2.197)	0.115 (3)	0.09466 (2.967)	0.1047 (1.828)	0.1285 (2.524)
R-pim	0.043 (0.9789)	0.04707 (1.034)	0.07201 (0.8024)	0.04999 (1.422)	0.03388 (0.7931)	0.04429 (1.12)	0.0368 (1.136)	0.03855 (0.8112)	0.04726 (0.8978)
CC1/2	0.978 (0.377)	0.999 (0.357)	0.996 (0.321)	0.998 (0.326)	0.998 (0.375)	0.998 (0.359)	0.999 (0.348)	0.998 (0.357)	0.998 (0.33)
CC*	0.994 (0.74)	1 (0.725)	0.999 (0.697)	0.999 (0.701)	1 (0.739)	1 (0.726)	1 (0.719)	0.999 (0.725)	1 (0.705)
Reflections used in refinement	111328 (10902)	68014 (6694)	57203 (5569)	128073 (12514)	120671 (11633)	96897 (9505)	75256 (7448)	211138 (20438)	94238 (9285)
Reflections used for R-free	5551 (563)	3390 (314)	2743 (244)	6486 (631)	6182 (614)	4779 (442)	3744 (388)	10616 (1028)	4743 (457)
R-work	0.222 (0.376)	0.2073 (0.3879)	0.1827 (0.2994)	0.2253 (0.5066)	0.1897 (0.3197)	0.1789 (0.2937)	0.2091 (0.3872)	0.1933 (0.3223)	0.1931 (0.3356)
R-free	0.242 (0.392)	0.2468 (0.4182)	0.2281 (0.3260)	0.2622 (0.4619)	0.2145 (0.3375)	0.2187 (0.3505)	0.2530 (0.4148)	0.2062 (0.3374)	0.2206 (0.3719)
CC(work)	0.958 (0.630)	0.960 (0.643)	0.969 (0.662)	0.962 (0.580)	0.968 (0.672)	0.970 (0.691)	0.962 (0.644)	0.961 (0.679)	0.962 (0.661)
CC(free)	0.942 (0.571)	0.968 (0.633)	0.939 (0.586)	0.944 (0.597)	0.960 (0.666)	0.950 (0.527)	0.948 (0.543)	0.958 (0.647)	0.949 (0.641)
Number of non-hydrogen atoms	6166	6041	6126	11339	6238	6066	5840	6201	6020
macromolecules	5233	5227	5225	10425	5235	5234	5201	5141	5159
ligands	190	190	190	380	190	310	338	190	190
solvent	743	624	711	534	813	642	421	870	671
Protein residues	667	667	666	1328	667	664	660	658	661
RMS(bonds)	0.007	0.01	0.007	0.01	0.01	0.017	0.011	0.005	0.007
RMS(angles)	0.9	1.08	0.82	1.73	1.13	1.43	1.17	0.86	0.91
Ramachandran favored (%)	97.12	96.66	97.11	95.81	97.12	97.56	95.54	97.54	96.94
Ramachandran allowed (%)	2.73	3.03	2.89	4.19	2.73	2.29	4.15	2.46	2.91
Ramachandran outliers (%)	0.15	0.3	0	0	0.15	0.15	0.31	0	0.15
Rotamer outliers (%)	1.95	0.88	3.19	3.55	2.47	2.11	2.32	1.45	2.52
Clashscore	4.81	6.43	3.69	2.42	3.87	3.11	11.71	3.56	3.16
Average B-factor	28.84	37.79	29.68	40.73	28.52	27.8	38.87	18.84	31.41
macromolecules	28.35	37.87	29.3	41.05	27.52	27.02	38.9	17.65	30.86
ligands	20.82	30.01	22.3	32.39	20.34	20.96	31.26	12.68	23.84
solvent	34.39	39.51	34.45	40.51	36.87	36.26	42.39	27.22	37.82
Number of TLS groups	4	1	4	8	1	1	1	4	4
